# Supplementary material for: No evidence for Fabaceae Gametophytic self-incompatibility being determined by Rosaceae, Solanaceae, and Plantaginaceae S-RNase lineage genes
Source: PubMed Central journal article supplement (PMC4451870; doi:10.1186/s12870-015-0497-2), 2015-06-02
Supplement: 12870_2015_497_MOESM3_ESM.pdf [file 12870_2015_497_MOESM3_ESM.pdf]

**Additional file 3.** Fabaceae *T2-RNases* available in GenBank, not presenting in their amino acid sequence amino acid pattern 4 [26]

| Gene name                 | Gene code     | PI   | Motif 1                                       | Motif 2                           | Motif 4 |
|---------------------------|---------------|------|-----------------------------------------------|-----------------------------------|---------|
| <i>Lotus corniculatus</i> |               |      |                                               |                                   |         |
| 511246152                 | <i>Lc1</i>    | 5.54 | FTIHGLWPD <u>Y</u>                            | WPS <u>L</u> SCG                  |         |
| 511259292                 | <i>Lc2</i>    | 8.66 | FTIHGLWPST                                    | <u>Q</u> PN <u>W</u> C <u>Q</u> P | -       |
| 511259293                 | <i>Lc3</i>    | 8.78 | FTIHGLWPST                                    | WPD <u>M</u> IKPT                 | -       |
| 511256017                 | <i>Lc4</i>    | 9.36 | FTIHGLWPGN                                    | WPN <u>M</u> L <u>K</u> A         | -       |
| <i>L. japonicus</i>       |               |      |                                               |                                   |         |
| 292789702 (AK339271)      | <i>Lj1</i>    | 9.78 | <u>L</u> VIHGLWPSN                            | WPE <u>M</u> L <u>P</u> P         | -       |
| BT148442                  | <i>Lj2</i>    | 7.55 | FTIHGLWPGN                                    | WPN <u>M</u> LAT                  | -       |
| 388505137 BT140840        | <i>Lj3</i>    | 6.79 | FTIHGLWPGN                                    | WPN <u>M</u> LAA                  | -       |
| CN825207 (AFK37221)       | <i>Lj4</i>    | 6.34 | FTIHGLWPGN                                    | WPN <u>M</u> LAA                  | -       |
| <i>Arachis hypogaea</i>   |               |      |                                               |                                   |         |
| 298122009                 | <i>Ah1</i>    | 5.14 | FTIHGLW <u>T</u> D <u>Y</u>                   | WPS <u>Y</u> SC <u>S</u>          | -       |
| 372398525                 | <i>Ah2</i>    | 6.24 | FTIHGLW <u>P</u> T <u>N</u>                   | WPS <u>L</u> Q <u>P</u> G         | -       |
| <i>Pisum sativum</i>      |               |      |                                               |                                   |         |
| 332432295                 | <i>Ps1</i>    | 5.94 | F <u>V</u> IHGLWPSK                           | WP <u>A</u> L <u>F</u> EN         | -       |
| 332444566                 | <i>Ps2</i>    | 8.82 | FTIHGLWPSK                                    | WP <u>A</u> L <u>F</u> KK         | -       |
| <i>Cajanus cajan</i>      |               |      |                                               |                                   |         |
| 297438042                 | <i>Ccajan</i> | 8.59 | FTI <u>Y</u> Y <u>L</u> R <u>P</u> R <u>K</u> | WPD <u>L</u> R <u>T</u> D         |         |
| <i>Lens culinaris</i>     |               |      |                                               |                                   |         |

|                                |              |      |                    |                          |                         |
|--------------------------------|--------------|------|--------------------|--------------------------|-------------------------|
| 331110541                      | <i>Lens1</i> | 6.16 | FTIHGLWPD <u>Y</u> | WPS <u>L</u> SC <u>G</u> | <u>S</u> PSS <u>C</u> S |
| <i>Cyamopsis tetragonoloba</i> |              |      |                    |                          |                         |
| EG990835                       | <i>Ct1</i>   | 8,86 | FTIHGLWPA <u>N</u> | WPNLKGT                  | -                       |
| <i>Medicago sativa</i>         |              |      |                    |                          |                         |
| 335964967                      | <i>Ns1</i>   | 5.69 | FTIHGLWPD <u>Y</u> | WPS <u>L</u> SC <u>G</u> | <u>S</u> PSS <u>C</u> S |

---

Underscored are amino acids that are not allowed in the motifs of [26]
