# Supplementary material for: No evidence for Fabaceae Gametophytic self-incompatibility being determined by Rosaceae, Solanaceae, and Plantaginaceae S-RNase lineage genes
Source: PubMed Central journal article supplement (PMC4451870; doi:10.1186/s12870-015-0497-2), 2015-06-02
Supplement: 12870_2015_497_MOESM4_ESM.pdf [file 12870_2015_497_MOESM4_ESM.pdf]

**Additional file 4:** Reads supporting expression of the *Mt3*, *Mt17*, *Mt18*, and *Mt2\_10* genes in SRP033257 experiment of *M. truncatula* (RNA-Seq data from a mixed sample of *M. truncatula* root knot galls infected with *Meloidogyne hapla* (a plant-nematode))

| Gene          | Reads                         |
|---------------|-------------------------------|
| <i>Mt3</i>    | gnl SRA SRR1043883.43136986.1 |
|               | gnl SRA SRR1043883.32010848.1 |
|               | gnl SRA SRR1043797.10726404.1 |
|               | gnl SRA SRR1043795.25285202.1 |
|               | gnl SRA SRR1043779.54087688.1 |
|               | gnl SRA SRR1043666.57815839.1 |
| <i>Mt17</i>   | gnl SRA SRR1043885.10658370.1 |
|               | gnl SRA SRR1043881.2087054.1  |
|               | gnl SRA SRR1043808.4289521.1  |
|               | gnl SRA SRR1043798.35907529.1 |
|               | gnl SRA SRR1043784.24879450.1 |
|               | gnl SRA SRR1043742.55576161.1 |
|               | gnl SRA SRR1043684.56906268.1 |
|               | gnl SRA SRR1043605.31305766.1 |
|               | gnl SRA SRR1043107.12591822.1 |
|               | gnl SRA SRR1043068.51016104.1 |
|               | gnl SRA SRR1043874.15040445.1 |
| <i>Mt18</i>   | gnl SRA SRR1043781.31064223.1 |
|               | gnl SRA SRR1043778.2254378.1  |
|               | gnl SRA SRR1043106.15306711.1 |
|               | gnl SRA SRR1043886.27606493.1 |
| <i>Mt2_10</i> | gnl SRA SRR1043876.38060156.1 |
|               | gnl SRA SRR1043744.3162043.1  |

gnl|SRA|SRR1043713.23430899.1

gnl|SRA|SRR1043686.23125586.1

gnl|SRA|SRR1043674.18978417.1

gnl|SRA|SRR1043106.35104704.1

---
