# Supplementary material for: No evidence for Fabaceae Gametophytic self-incompatibility being determined by Rosaceae, Solanaceae, and Plantaginaceae S-RNase lineage genes
Source: PubMed Central journal article supplement (PMC4451870; doi:10.1186/s12870-015-0497-2), 2015-06-02
Supplement: 12870_2015_497_MOESM6_ESM.pdf [file 12870_2015_497_MOESM6_ESM.pdf]

**Additional file 6.** The 100 most expressed genes of the *C. striatus* stigma with style transcriptome

| Gene             | FPKM     | Longest isoform     | Length (bp) | Sequence Description                             | InterProScan (PFAM)             | GO terms                                                                       | Mean similarity (%) |
|------------------|----------|---------------------|-------------|--------------------------------------------------|---------------------------------|--------------------------------------------------------------------------------|---------------------|
| <i>c48578_g1</i> | 15380.77 | <i>c48578_g1_i1</i> | 804         | NA                                               | IPR006501                       | F:pectinesterase activity; F:enzyme inhibitor activity                         | NA                  |
| <i>c50936_g1</i> | 12242.09 | <i>c50936_g1_i9</i> | 997         | proline-rich protein 4-like                      | no IPS match                    | NA                                                                             | NA                  |
| <i>c52888_g1</i> | 10478.76 | <i>c52888_g1_i6</i> | 1921        | l-ascorbate oxidase-like                         | IPR011707; IPR011706; IPR001117 | F:copper ion binding; F:oxidoreductase activity; P:oxidation-reduction process | 72.24               |
| <i>c51372_g2</i> | 9746.66  | <i>c51372_g2_i1</i> | 1161        | 1-aminocyclopropane-1-carboxylate oxidase        | IPR005123; IPR026992            | P:oxidation-reduction process; F:oxidoreductase activity                       | 92.40               |
| <i>c19588_g1</i> | 9687.56  | <i>c19588_g1_i1</i> | 208         | NA                                               | no IPS match                    | NA                                                                             | NA                  |
| <i>c48712_g1</i> | 8535.12  | <i>c48712_g1_i2</i> | 773         | pollen ole e 1 allergen and extensin family      | no IPS match                    | NA                                                                             | 64.65               |
| <i>c51468_g2</i> | 7286.2   | <i>c51468_g2_i1</i> | 1050        | lipid transfer                                   | IPR016140                       | NA                                                                             | 73.30               |
| <i>c48699_g2</i> | 7201.71  | <i>c48699_g2_i2</i> | 1035        | fasciclin-like arabinogalactan protein 3-like    | no IPS match                    | NA                                                                             | 71.55               |
| <i>c52392_g6</i> | 7038.02  | <i>c52392_g6_i1</i> | 365         | pectinesterase inhibitor domain                  | IPR000070                       | C:cell wall; P:cell wall modification; F:pectinesterase activity               | 66.55               |
| <i>c90467_g1</i> | 6788.62  | <i>c90467_g1_i1</i> | 569         | NA                                               | no IPS match                    | NA                                                                             | NA                  |
| <i>c50936_g2</i> | 6738.06  | <i>c50936_g2_i1</i> | 177         | repetitive proline-rich cell wall protein 1-like | no IPS match                    | NA                                                                             | 66.56               |
| <i>c50110_g2</i> | 6484.17  | <i>c50110_g2_i1</i> | 2534        | tonoplast intrinsic                              | no IPS match                    | NA                                                                             | 91.70               |
| <i>c46921_g3</i> | 6476.23  | <i>c46921_g3_i1</i> | 2136        | senescence-associated                            | no IPS match                    | NA                                                                             | 88.90               |
| <i>c48255_g4</i> | 6332.68  | <i>c48255_g4_i1</i> | 350         | NA                                               | no IPS match                    | NA                                                                             | NA                  |
| <i>c16527_g1</i> | 5646.63  | <i>c16527_g1_i1</i> | 178         | NA                                               | no IPS match                    | NA                                                                             | NA                  |
| <i>c45810_g2</i> | 5446.95  | <i>c45810_g2_i3</i> | 799         | NA                                               | no IPS match                    | NA                                                                             | NA                  |
| <i>c47271_g2</i> | 4948.52  | <i>c47271_g2_i3</i> | 833         | plant invertase pectin methylesterase inhibitor  | IPR006501                       | F:pectinesterase activity; F:enzyme inhibitor activity                         | 58.40               |
| <i>c47242_g1</i> | 4940.39  | <i>c47242_g1_i1</i> | 670         | NA                                               | no IPS match                    | NA                                                                             | NA                  |
| <i>c48578_g2</i> | 4883.16  | <i>c48578_g2_i1</i> | 1020        | hypothetical ENH_00061390                        | no IPS match                    | NA                                                                             | 78.00               |

|                  |         |                     |      |                                               |                         |                                                                                                                    |       |
|------------------|---------|---------------------|------|-----------------------------------------------|-------------------------|--------------------------------------------------------------------------------------------------------------------|-------|
| <i>c45963_g2</i> | 4459.43 | <i>c45963_g2_i3</i> | 1085 | kda proline-rich                              | IPR027923               | NA                                                                                                                 | 89.55 |
| <i>c43040_g1</i> | 4441.74 | <i>c43040_g1_i1</i> | 695  | NA                                            | no IPS match            | NA                                                                                                                 | NA    |
| <i>c42721_g1</i> | 4312.93 | <i>c42721_g1_i2</i> | 338  | cold dehydrin                                 | no IPS match            | NA                                                                                                                 | 74.25 |
| <i>c46311_g1</i> | 4214.36 | <i>c46311_g1_i1</i> | 1705 | s-like ribonuclease                           | IPR001568               | F:ribonuclease T2 activity; F:RNA binding                                                                          | 48.80 |
| <i>c42336_g1</i> | 4193.27 | <i>c42336_g1_i1</i> | 944  | invertase inhibitor-like                      | IPR006501               | F:enzyme inhibitor activity; F:pectinesterase activity                                                             | 73.40 |
| <i>c46687_g1</i> | 4079.14 | <i>c46687_g1_i2</i> | 894  | uncharacterized<br>LOC100305719               | IPR003496               | P:response to stress                                                                                               | 74.00 |
| <i>c75788_g1</i> | 4034.93 | <i>c75788_g1_i1</i> | 1025 | p21 family                                    | IPR001938               | NA                                                                                                                 | 87.05 |
| <i>c48812_g1</i> | 3930.24 | <i>c48812_g1_i3</i> | 1260 | NA                                            | no IPS match            | NA                                                                                                                 | NA    |
| <i>c51659_g1</i> | 3779.05 | <i>c51659_g1_i1</i> | 590  | NA                                            | no IPS match            | NA                                                                                                                 | NA    |
| <i>c50501_g2</i> | 3754.39 | <i>c50501_g2_i2</i> | 2312 | pectinesterase inhibitor-<br>like             | IPR000070;<br>IPR006501 | F:pectinesterase activity; P:cell wall<br>modification; C:cell wall; F:enzyme inhibitor<br>activity                | 74.15 |
| <i>c90364_g1</i> | 3627.86 | <i>c90364_g1_i1</i> | 517  | NA                                            | no IPS match            | NA                                                                                                                 | NA    |
| <i>c45961_g1</i> | 3489.33 | <i>c45961_g1_i1</i> | 667  | NA                                            | no IPS match            | NA                                                                                                                 | NA    |
| <i>c52061_g1</i> | 3421.89 | <i>c52061_g1_i2</i> | 1057 | pectinesterase inhibitor<br>28-like           | IPR000070               | C:cell wall; P:cell wall modification;<br>F:pectinesterase activity                                                | 84.85 |
| <i>c22143_g1</i> | 3230.07 | <i>c22143_g1_i1</i> | 865  | mlp-like protein 28                           | IPR000916               | P:defense response; P:response to biotic<br>stimulus                                                               | 68.60 |
| <i>c75794_g1</i> | 3125.87 | <i>c75794_g1_i1</i> | 680  | NA                                            | no IPS match            | NA                                                                                                                 | NA    |
| <i>c51219_g2</i> | 2960.16 | <i>c51219_g2_i2</i> | 1617 | s-adenosylmethionine<br>decarboxylase         | no IPS match            | NA                                                                                                                 | 85.95 |
| <i>c50488_g7</i> | 2936.95 | <i>c50488_g7_i1</i> | 1269 | major intrinsic protein<br>family transporter | IPR000425               | P:transport; C:membrane; F:transporter<br>activity                                                                 | 94.25 |
| <i>c48144_g1</i> | 2933.95 | <i>c48144_g1_i7</i> | 733  | ubiquitin-like                                | no IPS match            | NA                                                                                                                 | 99.50 |
| <i>c40350_g1</i> | 2790.6  | <i>c40350_g1_i1</i> | 275  | NA                                            | no IPS match            | NA                                                                                                                 | NA    |
| <i>c52392_g5</i> | 2773.69 | <i>c52392_g5_i1</i> | 1056 | pectinesterase inhibitor                      | IPR000070               | P:cell wall modification; C:cell wall;<br>F:pectinesterase activity                                                | 71.15 |
| <i>c51003_g1</i> | 2753.36 | <i>c51003_g1_i1</i> | 729  | xyloglucan<br>endotransglucosylase            | IPR010713               | P:cellular glucan metabolic process;<br>F:xyloglucan:xyloglucosyl transferase<br>activity; C:cell wall; C:apoplast | 92.90 |
| <i>c51003_g2</i> | 2654.02 | <i>c51003_g2_i1</i> | 617  | endo-xyloglucan<br>transferase                | IPR000757               | P:carbohydrate metabolic process;<br>F:hydrolase activity, hydrolyzing O-glycosyl<br>compounds                     | 94.40 |

|                  |         |                     |      |                                            |                      |                                                                                 |       |
|------------------|---------|---------------------|------|--------------------------------------------|----------------------|---------------------------------------------------------------------------------|-------|
| <i>c50255_g2</i> | 2653.13 | <i>c50255_g2_il</i> | 315  | ubiquitin-like partial                     | IPR000626            | F:protein binding                                                               | 99.50 |
| <i>c42538_g1</i> | 2644.45 | <i>c42538_g1_il</i> | 809  | dehydrin b                                 | IPR000167            | P:response to stress; P:response to water stimulus                              | 55.55 |
| <i>c46921_g1</i> | 2601.19 | <i>c46921_g1_il</i> | 1781 | senescence-associated partial              | no IPS match         | NA                                                                              | 83.55 |
| <i>c46492_g1</i> | 2463.08 | <i>c46492_g1_il</i> | 856  | 21 kda protein                             | no IPS match         | NA                                                                              | 84.45 |
| <i>c46038_g1</i> | 2437.19 | <i>c46038_g1_i3</i> | 467  | late embryogenesis abundant protein family | no IPS match         | NA                                                                              | 87.50 |
| <i>c46271_g2</i> | 2429.47 | <i>c46271_g2_il</i> | 375  | cytochrome b-c1 complex subunit 8-like     | IPR020101            | C:respiratory chain; C:mitochondrial inner membrane; P:electron transport chain | 85.80 |
| <i>c52202_g1</i> | 2416.04 | <i>c52202_g1_il</i> | 609  | pectate lyase-like                         | IPR002022            | -                                                                               | 83.50 |
| <i>c49613_g1</i> | 2376.49 | <i>c49613_g1_i2</i> | 1570 | polygalacturonase-like                     | IPR000743            | P:carbohydrate metabolic process; F:polygalacturonase activity                  | 80.80 |
| <i>c44507_g1</i> | 2363.77 | <i>c44507_g1_i2</i> | 598  | b12d protein                               | IPR010530            | NA                                                                              | 89.30 |
| <i>c52982_g1</i> | 2355.48 | <i>c52982_g1_il</i> | 2274 | atpase plasma membrane-type                | IPR008250; IPR023214 | F:nucleotide binding; F:metal ion binding                                       | 93.15 |
| <i>c1249_g1</i>  | 2352.19 | <i>c1249_g1_il</i>  | 485  | cell wall                                  | no IPS match         | NA                                                                              | 70.17 |
| <i>c35223_g1</i> | 2349.05 | <i>c35223_g1_il</i> | 1392 | gdsl esterase lipase at5g33370-like        | IPR001087            | P:lipid metabolic process; F:hydrolase activity, acting on ester bonds          | 88.20 |
| <i>c39168_g1</i> | 2346.25 | <i>c39168_g1_il</i> | 230  | hypothetical PHAVU_011G150500g             | no IPS match         | NA                                                                              | 88.00 |
| <i>c48584_g3</i> | 2327.12 | <i>c48584_g3_il</i> | 443  | protein ralf-like 9-like                   | IPR008801            | NA                                                                              | 58.25 |
| <i>c50298_g1</i> | 2302.94 | <i>c50298_g1_i3</i> | 515  | pectinesterase ppme1                       | no IPS match         | NA                                                                              | 76.05 |
| <i>c47149_g2</i> | 2266.48 | <i>c47149_g2_i2</i> | 905  | lipid transfer protein precursor           | no IPS match         | NA                                                                              | 75.80 |
| <i>c47764_g3</i> | 2184.35 | <i>c47764_g3_il</i> | 652  | acid beta-fructofuranosidase               | IPR013189            | NA                                                                              | 92.70 |
| <i>c44734_g1</i> | 2184.03 | <i>c44734_g1_i3</i> | 3141 | cell wall-associated hydrolase             | no IPS match         | NA                                                                              | 82.00 |
| <i>c41993_g1</i> | 2152.52 | <i>c41993_g1_il</i> | 790  | cell wall                                  | no IPS match         | NA                                                                              | 61.28 |
| <i>c52221_g1</i> | 2147.31 | <i>c52221_g1_i4</i> | 679  | NA                                         | no IPS match         | NA                                                                              |       |
| <i>c39797_g1</i> | 2137.55 | <i>c39797_g1_il</i> | 868  | mlp-like protein 423-like                  | IPR000916            | P:response to biotic stimulus; P:defense response                               | 83.55 |
| <i>c46440_g2</i> | 2129.59 | <i>c46440_g2_il</i> | 471  | arabinogalactan peptide 16-like            | no IPS match         | NA                                                                              | 83.39 |
| <i>c46355_g1</i> | 2075.15 | <i>c46355_g1_il</i> | 785  | NA                                         | IPR015157            | NA                                                                              | NA    |

|                  |         |                     |      |                                                            |                                       |                                                                                                                  |        |
|------------------|---------|---------------------|------|------------------------------------------------------------|---------------------------------------|------------------------------------------------------------------------------------------------------------------|--------|
| <i>c49376_g2</i> | 2039.82 | <i>c49376_g2_i2</i> | 492  | late embryogenesis abundant protein 1-like                 | no IPS match                          | -                                                                                                                | 77.45  |
| <i>c52202_g2</i> | 2013.73 | <i>c52202_g2_i2</i> | 943  | pectate lyase-like                                         | IPR007524;<br>IPR002022               | F:pectate lyase activity                                                                                         | 75.85  |
| <i>c49407_g1</i> | 2006.4  | <i>c49407_g1_i1</i> | 974  | stem 28 kda glycoprotein                                   | no IPS match                          | NA                                                                                                               | 82.00  |
| <i>c46921_g2</i> | 2002.22 | <i>c46921_g2_i1</i> | 2594 | rrna intron-encoded homing endonuclease                    | no IPS match                          | NA                                                                                                               | 76.80  |
| <i>c31965_g1</i> | 1962.53 | <i>c31965_g1_i1</i> | 790  | ekn protein                                                | no IPS match                          | NA                                                                                                               | 66.00  |
| <i>c45615_g2</i> | 1943.6  | <i>c45615_g2_i3</i> | 883  | ribulose- bisphosphate carboxylase oxygenase small subunit | IPR000894;<br>IPR024680               | NA                                                                                                               | 90.05  |
| <i>c48699_g1</i> | 1942.53 | <i>c48699_g1_i1</i> | 623  | NA                                                         | no IPS match                          | NA                                                                                                               |        |
| <i>c40016_g1</i> | 1932.13 | <i>c40016_g1_i1</i> | 808  | non-specific lipid-transfer protein 2-like                 | IPR016140                             | NA                                                                                                               | 86.00  |
| <i>c35211_g1</i> | 1925.86 | <i>c35211_g1_i1</i> | 738  | leguminosin group485 secreted peptide                      | no IPS match                          | NA                                                                                                               | 64.75  |
| <i>c51694_g1</i> | 1922.15 | <i>c51694_g1_i4</i> | 1636 | pectinesterase pectinesterase inhibitor                    | IPR000070;<br>IPR006501               | F:pectinesterase activity; C:cell wall; P:cell wall modification; F:enzyme inhibitor activity                    | 72.85  |
| <i>c51082_g2</i> | 1885.87 | <i>c51082_g2_i3</i> | 2125 | pectinesterase inhibitor 45-like                           | IPR006501;<br>IPR000070               | F:pectinesterase activity; F:enzyme inhibitor activity; P:cell wall modification; C:cell wall                    | 73.85  |
| <i>c52392_g2</i> | 1880.4  | <i>c52392_g2_i1</i> | 762  | pectinesterase inhibitor 21-like                           | IPR006501                             | F:enzyme inhibitor activity; F:pectinesterase activity                                                           | 72.60  |
| <i>c49201_g4</i> | 1877.53 | <i>c49201_g4_i2</i> | 325  | calmodulin                                                 | IPR002048                             | F:calcium ion binding                                                                                            | 100.00 |
| <i>c52376_g4</i> | 1869.32 | <i>c52376_g4_i3</i> | 1855 | alpha tubulin 1                                            | no IPS match                          | NA                                                                                                               | 99.00  |
| <i>c52177_g1</i> | 1868.51 | <i>c52177_g1_i1</i> | 2100 | sucrose transport                                          | no IPS match                          | NA                                                                                                               | 79.90  |
| <i>c48584_g2</i> | 1846.64 | <i>c48584_g2_i1</i> | 1344 | microtubule organization 1 family                          | IPR008801                             | NA                                                                                                               | 82.10  |
| <i>c41972_g2</i> | 1777.82 | <i>c41972_g2_i1</i> | 444  | probable pectate lyase 3-like                              | no IPS match                          | NA                                                                                                               | 79.40  |
| <i>c51841_g1</i> | 1712.04 | <i>c51841_g1_i1</i> | 2865 | beta-galactosidase 13-like                                 | IPR001944;<br>IPR000922;<br>IPR006104 | P:carbohydrate metabolic process; F:hydrolase activity, hydrolyzing O-glycosyl compounds; F:carbohydrate binding | 82.65  |
| <i>c47409_g1</i> | 1711.14 | <i>c47409_g1_i3</i> | 900  | protein ralf-like 19-like                                  | IPR008801                             | NA                                                                                                               | 74.35  |
| <i>c33197_g1</i> | 1703.12 | <i>c33197_g1_i1</i> | 1118 | phosphate-responsive 1 family                              | IPR006766                             | NA                                                                                                               | 62.55  |

|                  |         |                     |      |                                           |              |                                                                               |       |
|------------------|---------|---------------------|------|-------------------------------------------|--------------|-------------------------------------------------------------------------------|-------|
| <i>c35308_g1</i> | 1693.61 | <i>c35308_g1_il</i> | 199  | NA                                        | no IPS match | NA                                                                            | NA    |
| <i>c50150_g2</i> | 1658.2  | <i>c50150_g2_il</i> | 1506 | Lipoxygenase                              | IPR013819    | F:metal ion binding; P:oxidation-reduction process; F:oxidoreductase activity | 88.15 |
| <i>c20413_g1</i> | 1627.37 | <i>c20413_g1_il</i> | 386  | NA                                        | no IPS match | NA                                                                            | NA    |
| <i>c51808_g2</i> | 1625.43 | <i>c51808_g2_i2</i> | 218  | sphingolipid delta - desaturase des1-like | no IPS match | NA                                                                            | 95.90 |
| <i>c76225_g1</i> | 1624.68 | <i>c76225_g1_il</i> | 686  | cysteine proteinase inhibitor             | no IPS match | NA                                                                            | 88.85 |
| <i>c51857_g1</i> | 1621.74 | <i>c51857_g1_il</i> | 893  | adp-ribosylation factor 2-like            | no IPS match | NA                                                                            | 98.60 |
| <i>c50488_g3</i> | 1617.34 | <i>c50488_g3_il</i> | 180  | aquaporin protein 7                       | no IPS match | NA                                                                            | 93.00 |
| <i>c48268_g1</i> | 1605.12 | <i>c48268_g1_il</i> | 522  | polcalcic nic t 1-like                    | no IPS match | NA                                                                            | 92.90 |
| <i>c49048_g1</i> | 1578.23 | <i>c49048_g1_il</i> | 824  | NA                                        | no IPS match | NA                                                                            | NA    |
| <i>c42408_g1</i> | 1556.53 | <i>c42408_g1_il</i> | 505  | arabinogalactan peptide 23-like           | no IPS match | NA                                                                            | 66.33 |
| <i>c44616_g1</i> | 1555.27 | <i>c44616_g1_il</i> | 882  | linoleate 9s-lipoxygenase-like            | IPR013819    | F:metal ion binding; F:oxidoreductase activity; P:oxidation-reduction process | 89.25 |
| <i>c50673_g2</i> | 1548.65 | <i>c50673_g2_i2</i> | 373  | NA                                        | no IPS match | NA                                                                            | NA    |
| <i>c45131_g1</i> | 1517.41 | <i>c45131_g1_il</i> | 578  | nucleolar protein 58-like                 | no IPS match | NA                                                                            | 79.20 |
| <i>c47465_g2</i> | 1510.38 | <i>c47465_g2_il</i> | 684  | uncharacterized LOC101515237              | no IPS match | NA                                                                            | 59.25 |
| <i>c39091_g2</i> | 1510.04 | <i>c39091_g2_il</i> | 659  | pollen-specific protein c13-like          | no IPS match | NA                                                                            | 77.10 |
| <i>c38416_g1</i> | 1480.9  | <i>c38416_g1_il</i> | 722  | NA                                        | no IPS match | NA                                                                            | NA    |

FPKM- Fragments Per Kilobase of target transcript length per Million reads mapped

Mean similarity- the average similarity of the putative *C. striatus* protein and the 20 most similar proteins at NCBI

NA- not available

IPS- InterProScan
