# Supplementary material for: No evidence for Fabaceae Gametophytic self-incompatibility being determined by Rosaceae, Solanaceae, and Plantaginaceae S-RNase lineage genes
Source: PubMed Central journal article supplement (PMC4451870; doi:10.1186/s12870-015-0497-2), 2015-06-02
Supplement: 12870_2015_497_MOESM7_ESM.pdf [file 12870_2015_497_MOESM7_ESM.pdf]

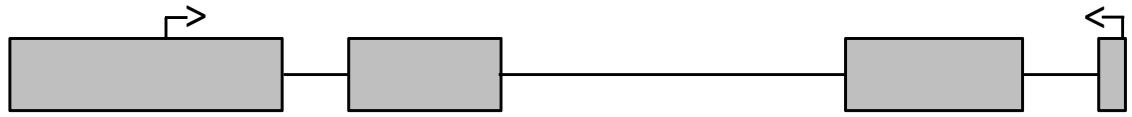

A

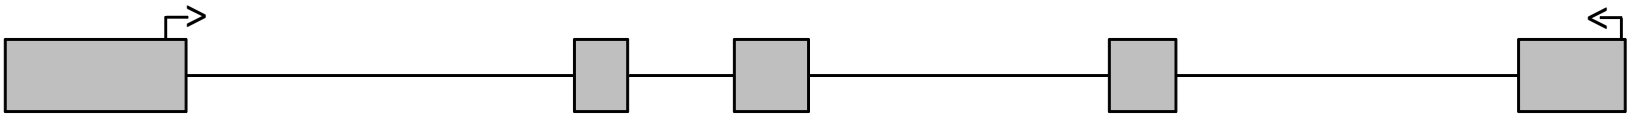

B

—  
100 bp

**Additional file 7**
