# Supplementary material for: No evidence for Fabaceae Gametophytic self-incompatibility being determined by Rosaceae, Solanaceae, and Plantaginaceae S-RNase lineage genes
Source: PubMed Central journal article supplement (PMC4451870; doi:10.1186/s12870-015-0497-2), 2015-06-02
Supplement: 12870_2015_497_MOESM10_ESM.pdf [file 12870_2015_497_MOESM10_ESM.pdf]

**Additional file 10.** Primers used in this work

| Gene            | Primer F        | Sequence             | Primer R     | Sequence             | T.a.° | Size (bp)                    |
|-----------------|-----------------|----------------------|--------------|----------------------|-------|------------------------------|
| <i>Elf1-α</i>   | Elf1-F          | CCACCAACCTTGACTGGTAC | Elf1-R       | CCACGCTTGAGATCCTTCAC | 54    | 319                          |
| <i>Tp6</i>      | 5450-F          | CGACTTACTTCAGTTTGC   | 5450-R       | AAATGAGAGAAGGTTCAA   | 49    | 449 (genomic)<br>408 (cDNA)  |
| <i>Tp3</i>      | 1821-F          | TATGGTCGCAGCTCAATG   | 1821-R       | GCTAGTAGGCTTTCAAAA   | 49    | 483 (genomic)<br>410 (cDNA)  |
| <i>CsRNase1</i> | CytSRN-62F      | TGCTATCTTTACAATGGC   | CytRNase531R | TTACCCTTTTTATCGTCA   | 49    | 1056 (genomic)<br>487 (cDNA) |
|                 |                 |                      | CytSRN-379R  | TTTTTCCAAGAGCAATAG   |       |                              |
|                 | CytSRN-Fintrao2 | AAAACACTCGTCAACAAT   | CytSRN-R     | ATCGCTTCCTCAACATCC   | 48    | 547                          |
| <i>CsRNase2</i> | CytR2-cons142F  | TGTAGCAAACCATCCTCA   | CytR2-445R   | AGAAGCACAGACGAAGTT   | 52    | 1183 (genomic)<br>299 (cDNA) |
|                 | CytR2-824F      | TGTAGCAAACCATCCTCA   |              |                      |       |                              |
|                 |                 |                      | CytR2-Rint   | AGATTATTACCCCACTGC   |       |                              |
| <i>CsRNase3</i> | Cy10F           | ATGGGGCTTATGACTATT   | Cy10R        | GGAAAACGATGTGGTGAG   | 48    | 169                          |
